# Supplementary material for: Physiological, Agronomical, and Proteomic Studies Reveal Crucial Players in Rice Nitrogen Use Efficiency under Low Nitrogen Supply
Source: MDPI journal article supplement (doi:10.3390/ijms23126410), 2022-06-08
Supplement: s1 [file s1]

## Supplementary Figures

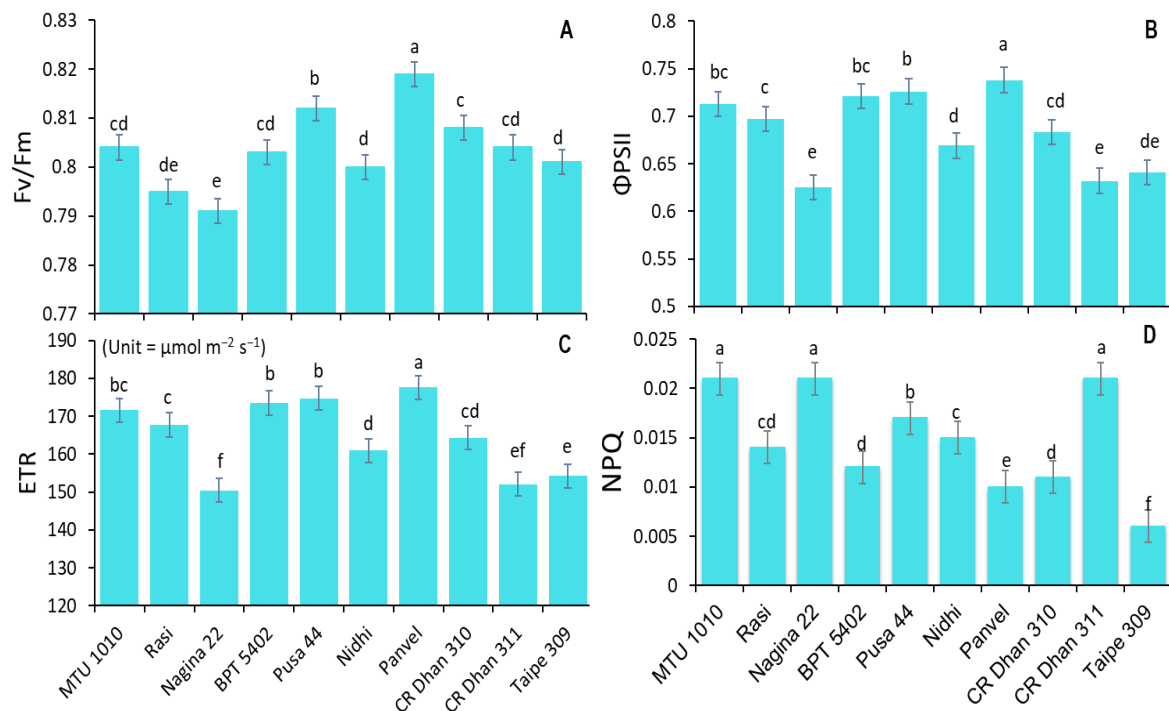

**Supplementary Figure S1.** Measurement of chlorophyll fluorescence of photosystem II of ten rice cultivars at low-NPS supply. (A) Total photochemical quantum efficiency, (B) effective photochemical quantum efficiency, (C) electron transport rate, and (D) non-photochemical quenching. Graph bars are representing mean  $\pm$  SE with different letters denoting significant difference at  $P < 0.05$ .

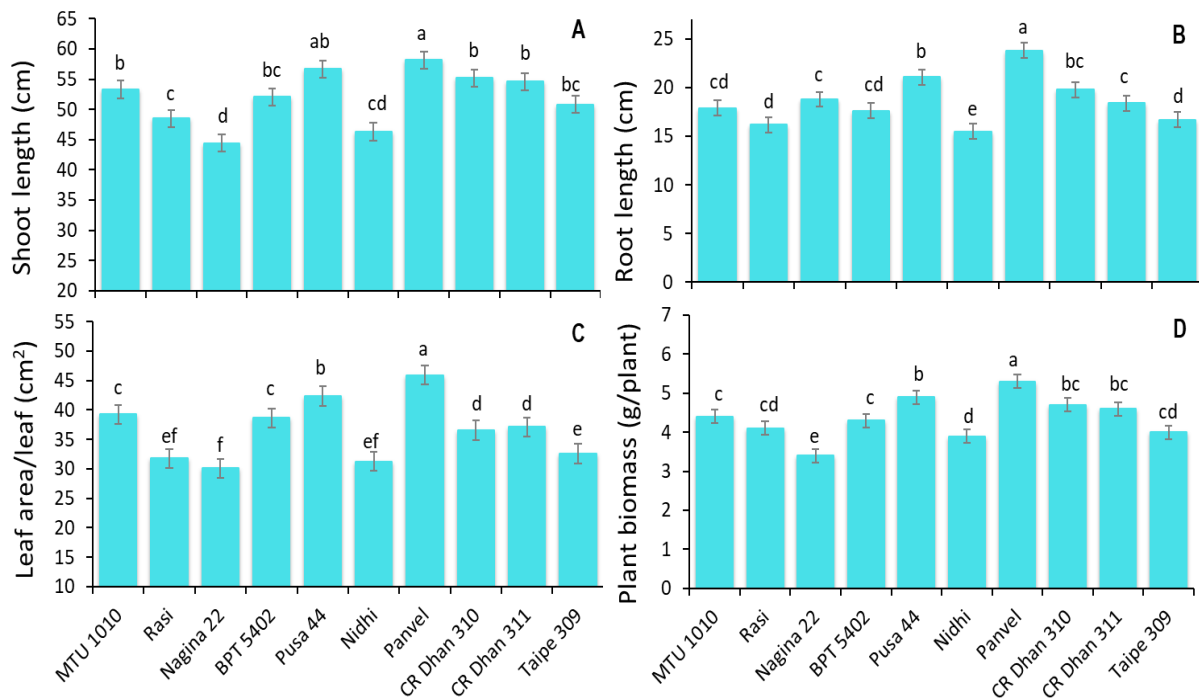

**Supplementary Figure S2.** Measurement of plant growth traits of ten rice cultivars at low-NPS supply during screening. (A) Shoot and (B) root lengths were measured in centimeter by measuring-scale, (C) leaf area of 5th leaf was calculated in centimeter square and, (d) plant biomass was measured in gram per plant. Graph bars are representing mean  $\pm$  SE with different letters denoting significant difference at  $< 0.05$ .

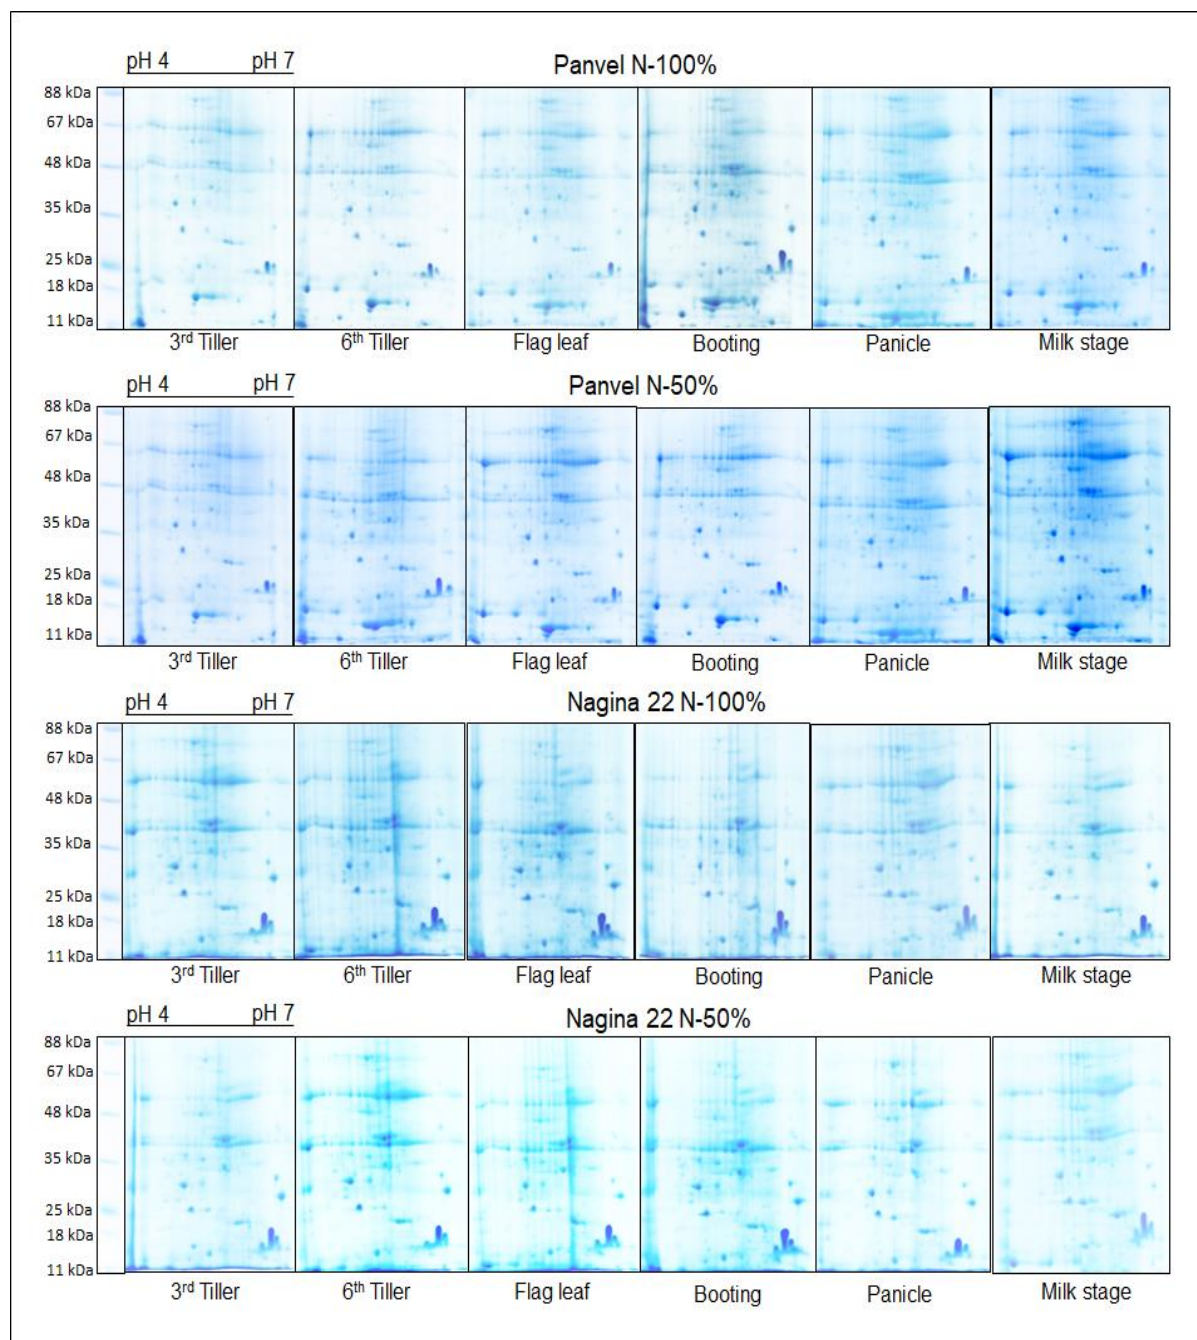

**Supplementary Figure S3.** Representation of 2-DE maps of leaf proteome of six specific growth stages of rice cultivar Panvel and Nagina 22 at optimum (100%) and low (50%) nitrogen supply.
