# Supplementary material for: Physiological, Agronomical, and Proteomic Studies Reveal Crucial Players in Rice Nitrogen Use Efficiency under Low Nitrogen Supply
Source: MDPI journal article supplement (doi:10.3390/ijms23126410), 2022-06-08
Supplement: s1 [file s1]

## Supplementary Tables

**Supplementary Table S1.** One-way ANOVA analysis of gas-exchange, SPAD, chlorophyll fluorescence, plant growth, Rubisco activity, and leaf mineral nutrient content traits of rice cultivars

| Parameter                      | F-Value | P-Value | R-sq   |
|--------------------------------|---------|---------|--------|
| P <sub>n</sub>                 | 4.57    | 0.002   | 67.27% |
| g <sub>s</sub>                 | 3.90    | 0.005   | 63.73% |
| C <sub>i</sub>                 | 3.57    | 0.007   | 59.21% |
| T <sub>r</sub>                 | 1.63    | 0.174   | 42.30% |
| SPAD                           | 4.37    | 0.003   | 66.31% |
| F                              | 1.77    | 0.197   | 39.48% |
| F <sub>o</sub> '               | 2.85    | 0.043   | 51.22% |
| F <sub>m</sub> '               | 2.91    | 0.025   | 56.03% |
| F <sub>v</sub> /F <sub>m</sub> | 11.21   | 0.000   | 48.37% |
| Φ <sub>PSII</sub>              | 7.53    | 0.000   | 39.88% |
| ETR                            | 4.48    | 0.001   | 40.12% |
| qN                             | 5.24    | 0.008   | 61.89% |
| qP                             | 8.62    | 0.000   | 55.26% |
| qL                             | 3.63    | 0.003   | 47.66% |
| NPQ                            | 9.31    | 0.001   | 61.49% |
| Y(NO)                          | 4.47    | 0.002   | 57.71% |
| Y(NPQ)                         | 3.88    | 0.005   | 49.92% |
| Shoot length                   | 4.36    | 0.000   | 37.54% |
| Root length                    | 5.44    | 0.003   | 44.67% |
| Leaf area                      | 7.86    | 0.000   | 52.38% |
| Plant biomass                  | 3.77    | 0.001   | 62.55% |
| Rubisco enzyme activity        | 4.45    | 0.000   | 60.93% |
| Rubisco protein content        | 3.89    | 0.003   | 49.88% |
| Soluble protein content        | 7.65    | 0.000   | 32.58% |
| Leaf N content                 | 10.13   | 0.000   | 55.61% |
| Leaf P content                 | 4.12    | 0.021   | 61.78% |
| Leaf S content                 | 3.72    | 0.033   | 59.25% |

**Supplementary Table S2.** Gas-exchange and SPAD measurements of ten rice cultivars under low NPS in the screening experiment

| Cultivars   | P <sub>n</sub><br>(μ mol m <sup>-2</sup> s <sup>-1</sup> ) | g <sub>s</sub><br>(mol m <sup>-2</sup> s <sup>-1</sup> ) | C <sub>i</sub><br>(μ mol CO <sub>2</sub> mol <sup>-1</sup> ) | T <sub>r</sub><br>(mmol m <sup>-2</sup> s <sup>-1</sup> ) | SPAD<br>(nmol chl. cm <sup>-2</sup> ) |
|-------------|------------------------------------------------------------|----------------------------------------------------------|--------------------------------------------------------------|-----------------------------------------------------------|---------------------------------------|
| MTU 1010    | 22.24 ± 1.76 <sup>c</sup>                                  | 0.331 ± 0.023 <sup>d</sup>                               | 238 ± 14.52 <sup>bc</sup>                                    | 13.6 ± 1.02 <sup>c</sup>                                  | 47.01 ± 3.41 <sup>b</sup>             |
| Rasi        | 21.22 ± 1.44 <sup>de</sup>                                 | 0.323 ± 0.021 <sup>e</sup>                               | 231 ± 12.34 <sup>cd</sup>                                    | 13.1 ± 1.07 <sup>cd</sup>                                 | 45.42 ± 4.22 <sup>c</sup>             |
| Nagina 22   | 19.68 ± 1.51 <sup>e</sup>                                  | 0.317 ± 0.022 <sup>f</sup>                               | 227 ± 14.28 <sup>d</sup>                                     | 12.7 ± 1.09 <sup>d</sup>                                  | 43.81 ± 3.82 <sup>d</sup>             |
| BPT 5402    | 22.09 ± 1.13 <sup>cd</sup>                                 | 0.328 ± 0.024 <sup>de</sup>                              | 235 ± 11.93 <sup>c</sup>                                     | 13.5 ± 1.01 <sup>c</sup>                                  | 46.62 ± 3.39 <sup>bc</sup>            |
| Pusa 44     | 23.11 ± 1.56 <sup>b</sup>                                  | 0.344 ± 0.026 <sup>b</sup>                               | 245 ± 13.32 <sup>b</sup>                                     | 14.2 ± 1.05 <sup>b</sup>                                  | 48.11 ± 4.21 <sup>ab</sup>            |
| Nidhi       | 21.57 ± 2.23 <sup>d</sup>                                  | 0.324 ± 0.021 <sup>e</sup>                               | 230 ± 12.37 <sup>cd</sup>                                    | 13.2 ± 1.02 <sup>cd</sup>                                 | 45.74 ± 2.97 <sup>c</sup>             |
| Panvel      | 24.21 ± 2.12 <sup>a</sup>                                  | 0.352 ± 0.031 <sup>a</sup>                               | 252 ± 15.78 <sup>a</sup>                                     | 15.6 ± 1.12 <sup>a</sup>                                  | 49.54 ± 3.65 <sup>a</sup>             |
| CR Dhan 310 | 22.94 ± 2.45 <sup>bc</sup>                                 | 0.339 ± 0.025 <sup>c</sup>                               | 243 ± 16.22 <sup>bc</sup>                                    | 14.3 ± 1.11 <sup>b</sup>                                  | 47.47 ± 4.11 <sup>b</sup>             |
| CR Dhan 311 | 22.92 ± 1.53 <sup>bc</sup>                                 | 0.337 ± 0.028 <sup>cd</sup>                              | 241 ± 12.71 <sup>bc</sup>                                    | 13.8 ± 1.10 <sup>bc</sup>                                 | 47.29 ± 4.23 <sup>b</sup>             |
| Taipe 309   | 21.98 ± 2.03 <sup>cd</sup>                                 | 0.326 ± 0.024 <sup>de</sup>                              | 232 ± 13.15 <sup>c</sup>                                     | 13.3 ± 1.06 <sup>cd</sup>                                 | 46.36 ± 3.74 <sup>bc</sup>            |

Note: Result data are the mean ± SE and the different letters indicate statistically significant differences among cultivars in Tukey comparisons ( $P < 0.05$ ). P<sub>n</sub> = net photosynthetic rate; g<sub>s</sub> = stomatal conductance; C<sub>i</sub> = intercellular CO<sub>2</sub> rate; T<sub>r</sub> = transpiration rate; and SPAD = soil and plant analyzer development.

**Supplementary Table S3.** Coefficient and yield of photochemical and non-photochemical quenching of photosystem II of the ten rice cultivars in the screening experiment

| Cultivars   | qN                          | qP                          | qL                          | Y(NO)                       | Y(NPQ)                      |
|-------------|-----------------------------|-----------------------------|-----------------------------|-----------------------------|-----------------------------|
| MTU 1010    | 0.024 ± 0.006 <sup>ab</sup> | 0.781 ± 0.045 <sup>e</sup>  | 0.415 ± 0.039 <sup>e</sup>  | 0.367 ± 0.021 <sup>a</sup>  | 0.008 ± 0.002 <sup>a</sup>  |
| Rasi        | 0.016 ± 0.003 <sup>bc</sup> | 0.931 ± 0.076 <sup>a</sup>  | 0.737 ± 0.048 <sup>a</sup>  | 0.259 ± 0.019 <sup>e</sup>  | 0.003 ± 0.001 <sup>c</sup>  |
| Nagina 22   | 0.025 ± 0.007 <sup>a</sup>  | 0.813 ± 0.037 <sup>d</sup>  | 0.479 ± 0.021 <sup>d</sup>  | 0.352 ± 0.034 <sup>b</sup>  | 0.007 ± 0.003 <sup>ab</sup> |
| BPT 5402    | 0.014 ± 0.003 <sup>c</sup>  | 0.900 ± 0.068 <sup>b</sup>  | 0.643 ± 0.031 <sup>b</sup>  | 0.276 ± 0.021 <sup>de</sup> | 0.003 ± 0.001 <sup>c</sup>  |
| Pusa 44     | 0.019 ± 0.005 <sup>b</sup>  | 0.896 ± 0.043 <sup>bc</sup> | 0.621 ± 0.033 <sup>bc</sup> | 0.270 ± 0.018 <sup>de</sup> | 0.004 ± 0.001 <sup>bc</sup> |
| Nidhi       | 0.018 ± 0.004 <sup>b</sup>  | 0.839 ± 0.039 <sup>cd</sup> | 0.512 ± 0.027 <sup>c</sup>  | 0.326 ± 0.032 <sup>bc</sup> | 0.005 ± 0.002 <sup>b</sup>  |
| Panvel      | 0.012 ± 0.002 <sup>cd</sup> | 0.853 ± 0.044 <sup>c</sup>  | 0.515 ± 0.026 <sup>c</sup>  | 0.300 ± 0.027 <sup>cd</sup> | 0.003 ± 0.001 <sup>c</sup>  |
| CR Dhan 310 | 0.013 ± 0.003 <sup>cd</sup> | 0.847 ± 0.048 <sup>c</sup>  | 0.517 ± 0.036 <sup>c</sup>  | 0.314 ± 0.024 <sup>c</sup>  | 0.003 ± 0.001 <sup>c</sup>  |
| CR Dhan 311 | 0.024 ± 0.007 <sup>ab</sup> | 0.781 ± 0.033 <sup>e</sup>  | 0.415 ± 0.026 <sup>e</sup>  | 0.367 ± 0.031 <sup>a</sup>  | 0.008 ± 0.003 <sup>a</sup>  |
| Taipe 309   | 0.007 ± 0.002 <sup>e</sup>  | 0.891 ± 0.041 <sup>bc</sup> | 0.620 ± 0.038 <sup>bc</sup> | 0.285 ± 0.022 <sup>d</sup>  | 0.002 ± 0.001 <sup>cd</sup> |

Note: Result data are the mean ± SE and the different letters indicate statistically significant differences among cultivars in Tukey comparisons ( $P < 0.05$ ). qN = Coefficient of non-photochemical fluorescence quenching; qP and qL = Coefficient of photochemical fluorescence quenching; Y(NO) = Quantum yield of non-regulated fluorescence emission; and Y(NPQ) = Quantum yield non-photochemical fluorescence quenching.

**Supplementary Table S4.** Rubisco enzyme activity, Rubisco protein content and, the soluble protein content of leaves of ten rice cultivars in the screening experiment

| Cultivars   | Rubisco enzyme activity<br>(nmol <sup>-1</sup> g <sup>-1</sup> FW) | Rubisco protein content<br>(mg cm <sup>-1</sup> FW) | Soluble protein content<br>(mg g <sup>-1</sup> FW) |
|-------------|--------------------------------------------------------------------|-----------------------------------------------------|----------------------------------------------------|
| MTU 1010    | 209.13 ± 9.22 <sup>bc</sup>                                        | 0.138 ± 0.021 <sup>cd</sup>                         | 29.22 ± 3.42 <sup>c</sup>                          |
| Rasi        | 189.71 ± 7.54 <sup>e</sup>                                         | 0.132 ± 0.023 <sup>de</sup>                         | 23.56 ± 2.99 <sup>de</sup>                         |
| Nagina 22   | 187.65 ± 7.11 <sup>e</sup>                                         | 0.129 ± 0.016 <sup>e</sup>                          | 21.79 ± 2.89 <sup>e</sup>                          |
| BPT 5402    | 197.55 ± 5.93 <sup>d</sup>                                         | 0.136 ± 0.023 <sup>d</sup>                          | 27.55 ± 3.67 <sup>cd</sup>                         |
| Pusa 44     | 211.36 ± 6.27 <sup>b</sup>                                         | 0.145 ± 0.022 <sup>b</sup>                          | 30.12 ± 4.57 <sup>b</sup>                          |
| Nidhi       | 193.81 ± 5.48 <sup>de</sup>                                        | 0.131 ± 0.019 <sup>e</sup>                          | 24.68 ± 3.22 <sup>d</sup>                          |
| Panvel      | 224.62 ± 7.89 <sup>a</sup>                                         | 0.148 ± 0.026 <sup>a</sup>                          | 33.57 ± 4.12 <sup>a</sup>                          |
| CR Dhan 310 | 203.72 ± 6.93 <sup>c</sup>                                         | 0.142 ± 0.021 <sup>c</sup>                          | 28.44 ± 3.25 <sup>cd</sup>                         |
| CR Dhan 311 | 205.28 ± 6.22 <sup>c</sup>                                         | 0.141 ± 0.024 <sup>c</sup>                          | 29.12 ± 3.71 <sup>c</sup>                          |
| Taipe 309   | 195.47 ± 5.14 <sup>de</sup>                                        | 0.134 ± 0.022 <sup>de</sup>                         | 24.11 ± 3.00 <sup>d</sup>                          |

Note: Result data are the mean ± SE (FW = fresh weight) and the different letters indicate statistically significant differences among cultivars in Tukey comparisons ( $P < 0.05$ ).

**Supplementary Table S5.** Leaf nitrogen, phosphorus, and sulphur contents of the ten rice cultivars grown at the low-NPS supply

| Cultivars   | Leaf N content<br>(mg g <sup>-1</sup> DW) | Leaf P content<br>(mg g <sup>-1</sup> DW) | Leaf S content<br>(mg g <sup>-1</sup> DW) |
|-------------|-------------------------------------------|-------------------------------------------|-------------------------------------------|
| MTU 1010    | 4.20 ± 0.13 <sup>c</sup>                  | 2.05 ± 0.11 <sup>bc</sup>                 | 2.91 ± 0.22 <sup>ab</sup>                 |
| Rasi        | 3.92 ± 0.14 <sup>e</sup>                  | 1.72 ± 0.09 <sup>de</sup>                 | 2.65 ± 0.18 <sup>c</sup>                  |
| Nagina 22   | 3.12 ± 0.09 <sup>f</sup>                  | 1.61 ± 0.07 <sup>e</sup>                  | 2.24 ± 0.15 <sup>d</sup>                  |
| BPT 5402    | 4.16 ± 0.12 <sup>cd</sup>                 | 1.84 ± 0.10 <sup>d</sup>                  | 2.72 ± 0.16 <sup>bc</sup>                 |
| Pusa 44     | 4.44 ± 0.11 <sup>b</sup>                  | 2.12 ± 0.12 <sup>b</sup>                  | 2.83 ± 0.19 <sup>b</sup>                  |
| Nidhi       | 4.10 ± 0.13 <sup>d</sup>                  | 1.81 ± 0.11 <sup>d</sup>                  | 2.66 ± 0.14 <sup>c</sup>                  |
| Panvel      | 4.60 ± 0.16 <sup>a</sup>                  | 2.33 ± 0.14 <sup>a</sup>                  | 3.04 ± 0.21 <sup>a</sup>                  |
| CR Dhan 310 | 4.32 ± 0.11 <sup>bc</sup>                 | 1.95 ± 0.10 <sup>c</sup>                  | 2.80 ± 0.20 <sup>b</sup>                  |
| CR Dhan 311 | 4.28 ± 0.13 <sup>bc</sup>                 | 1.92 ± 0.11 <sup>c</sup>                  | 2.81 ± 0.17 <sup>b</sup>                  |
| Taipe 309   | 4.11 ± 0.10 <sup>d</sup>                  | 1.80 ± 0.12 <sup>d</sup>                  | 2.61 ± 0.11 <sup>c</sup>                  |

Note: Result data are the mean ± SE (DW = dry weight) and the different letters indicate statistically significant differences among cultivars in Tukey comparisons ( $P < 0.05$ ). N = nitrogen; P = phosphorus; and S = sulphur.

**Supplementary Table S6.** Analysis of variance (3-way ANOVA) of gas-exchange, chlorophyll fluorescence, biochemical, and plant growth traits of the rice cultivars grown under two N levels

| Traits                         | C       | T        | GS      | C × T   | C × GS              | T × GS  | C × T × GS         | R <sup>2</sup> |
|--------------------------------|---------|----------|---------|---------|---------------------|---------|--------------------|----------------|
| P <sub>n</sub>                 | 9.56*   | 35.66*** | 28.92** | 29.34** | 24.75*              | 52.61** | 1.63*              | 69.74%         |
| g <sub>s</sub>                 | 6.89*   | 47.84**  | 31.22*  | 31.87*  | 27.62*              | 42.57*  | 0.78 <sup>ns</sup> | 58.47%         |
| C <sub>i</sub>                 | 10.22** | 43.53**  | 35.21*  | 33.26*  | 29.44 <sup>ns</sup> | 39.56*  | 0.81 <sup>ns</sup> | 48.34%         |
| SPAD                           | 8.12*   | 35.69*   | 51.22** | 27.54*  | 42.33*              | 39.46*  | 1.52 <sup>ns</sup> | 55.49%         |
| F <sub>v</sub> /F <sub>m</sub> | 3.16*   | 14.86*** | 23.41** | 11.45** | 12.32*              | 17.13*  | 1.77*              | 49.83%         |
| Φ <sub>PSII</sub>              | 2.67**  | 16.47**  | 10.56*  | 9.86*   | 7.94*               | 13.52*  | 1.66*              | 55.38%         |
| ETR                            | 21.24** | 32.45**  | 18.74*  | 24.33*  | 19.52*              | 14.22*  | 1.92*              | 63.77%         |
| qP                             | 4.55*   | 28.94**  | 21.44*  | 14.57*  | 7.66 <sup>ns</sup>  | 11.87*  | 0.89 <sup>ns</sup> | 52.62%         |
| NPQ                            | 7.23*   | 31.66*** | 22.91** | 21.37** | 14.11*              | 25.47** | 1.97*              | 58.43%         |
| Shoot length                   | 15.78** | 42.57*** | 37.58** | 25.48** | 21.18*              | 28.35** | 2.33*              | 65.21%         |
| Leaf area                      | 8.67*   | 41.32**  | 29.69*  | 26.47*  | 17.88*              | 29.45*  | 0.85 <sup>ns</sup> | 51.36%         |
| Plant biomass                  | 7.84*   | 22.43**  | 31.65** | 17.86*  | 19.72*              | 23.19*  | 1.93*              | 49.71%         |
| Rubisco enzyme activity        | 12.28*  | 37.64*** | 35.48** | 21.17*  | 20.83*              | 25.66*  | 2.76*              | 62.57%         |
| Rubisco protein content        | 5.42*   | 25.49**  | 19.63*  | 18.38*  | 12.55 <sup>ns</sup> | 18.82*  | 0.71 <sup>ns</sup> | 38.95%         |
| Soluble protein content        | 10.33*  | 31.53**  | 22.47*  | 19.77*  | 15.92*              | 23.41*  | 0.79 <sup>ns</sup> | 44.95%         |
| Leaf N content                 | 6.43*   | 42.58*** | 19.62** | 24.81** | 12.48*              | 17.99*  | 1.83*              | 47.82%         |

Note: The values in each column represents *F*-value and asterisks denotes the significant differences at \* $P < 0.05$ , \*\* $P < 0.01$  and \*\*\* $P < 0.001$ . C = cultivars; T = treatment; and ns = not significant.

**Supplementary Table S7.** Analysis of variance (2-way ANOVA) of total tillers per hill, agronomic traits, N uptake efficiency, N use efficiency

| Traits                   | C        | T        | C × T              | R <sup>2</sup> |
|--------------------------|----------|----------|--------------------|----------------|
| Total tillers per hill   | 17.48*** | 35.73*** | 2.14*              | 64.82%         |
| Panicles per hill        | 9.39**   | 43.82*** | 2.73*              | 71.36%         |
| Panicle length           | 12.23**  | 52.14**  | 1.92*              | 56.38%         |
| Grains per panicle       | 23.45**  | 46.71*** | 2.67*              | 49.63%         |
| 1000grains weight        | 6.26*    | 50.42**  | 1.18 <sup>ns</sup> | 43.85%         |
| Panicle per meter square | 12.66**  | 34.85*** | 2.88*              | 51.28%         |
| Grain yield              | 22.59*** | 44.84*** | 1.85*              | 48.52%         |
| N uptake efficiency      | 9.78**   | 47.16*** | 1.86*              | 53.47%         |
| N utilization efficiency | 15.87**  | 45.93*** | 2.21*              | 67.19%         |
| N use efficiency         | 13.54**  | 42.19*** | 2.01*              | 62.33%         |

Note: The values in each column represents *F*-value and asterisks denotes the significant differences at \**P* < 0.05, \*\**P* < 0.01 and \*\*\**P* < 0.001. C = cultivars; T = treatment; and ns = not significant.

**Supplementary Table S9.** List of genes for validation with their forward and reverse primers

| Accession number | Protein description                            | Gene name    | Primers<br>[F = Forward; R = Reverse]                            |
|------------------|------------------------------------------------|--------------|------------------------------------------------------------------|
| Q7F2G3           | Carbonic anhydrase                             | Os01g0639900 | F 5'-TGGAGAACCTCAAGACCTAC-3'<br>R 5'-ACTGACGAACTGAACGGAC-3'      |
| Q0DG05           | Photosystem I reaction center subunit VI       | PSAH         | F 5'-AGGATGTTATGCTCTGCCTG-3'<br>R 5'-GCTGCTACTGCTGTTTTCTTG-3'    |
| Q10HD0           | Chlorophyll a-b binding protein, chloroplastic | RCABP89      | F 5'-CACCACACACCACAAAAAAC-3'<br>R 5'-AGGTCCATACCAGATGCTC-3'      |
| Q7XCK0           | Glutathione S-transferase                      | GST          | F 5'-CCTGTCTGTCAAACCTGCTTTC-3'<br>R 5'-ACCTTCCTATTTCATCTTCCCC-3' |
| P16081           | Nitrate reductase [NADH] 1                     | NIA1         | F 5'-CGAGTCCGACAACCTACTACC-3'<br>R 5'-TCACCGAGTTCACGTTTCAG-3'    |
| Q5W6H5           | Chlorophyll synthase, chloroplastic            | CHLG         | F 5'-ATGAAAGCAGCAATCGCC-3'<br>R 5'-GCAAAGTAGCAAAACGACCC-3'       |
| Q0IU70           | Nitrogen fixation protein, putative            | Os11g07916   | F 5'-ATGAAAGCAGCAATCGCC-3'<br>R 5'-GCAAAGTAGCAAAACGACCC-3'       |
| Q6AUR2           | Nitrogen regulatory protein P-II homolog       | GLB          | F 5'-TGAAAAGGCAAGAACAGGAG-3'<br>R 5'-CATCATCACTAATCAACAGGGG-3'   |
| Q0JG75           | Photosystem II reaction center PSB28 protein   | PSB28        | F 5'-TTTTTCTCCTTTTTTCCCCCTC-3'<br>R 5'-GCACACACCAAACAACCTCATC-3' |
| P93431           | RuBisCO activase                               | RCA          | F 5'-GATGTAACACACAGAGTGCC-3'<br>R 5'-ACCACCAATCTCTTCTACCC-3'     |
| Q10DV7           | Actin-1 (as reference gene)                    | ACT1         | F 5'-TGACAGGATGAGCAAGGAG-3'<br>R 5'-CAAAAAGAGAGAAACAAGCAGG-3'    |
