# Supplementary material for: Physiological, Agronomical, and Proteomic Studies Reveal Crucial Players in Rice Nitrogen Use Efficiency under Low Nitrogen Supply
Source: Int J Mol Sci. 2022 Jun 8;23(12):6410. doi: 10.3390/ijms23126410 (PMC9224494; doi:10.3390/ijms23126410)
Supplement: Supplementary file 1 [file ijms-23-06410-s001.zip › Supplementary Table S8.xlsx]

## Sheet: Annoniated proteins 
Supplementary Table S8. Identification, subcellular localization, and quantitative analysis of differentially expressed leaf proteins of the rice cultivars Nagina 22 and Panvel under low-N supply
										Relative spot intensity (fold-change)
										Cultivar Panvel						Cultivar Nagina 22
Accession Number	Protein annoniation	Thr. Mr.	Thr. pI	Exp. Mr. (KDa)	Exp. pI	M.S.	Number of matched peptides	Chromosome number	Mode of regulation	S1	S2	S3	S4	S5	S6	S1	S2	S3	S4	S5	S6	Cellular location	Biological function	Molecular function
P35687	40S ribosomal protein S21	9.2	7.34	13.4	6.7	122	6	3	↓	-2	-2.2	-2.1	-2.4	-2.5	-2.9	-2.7	-2.5	-2.6	-3.2	-3.5	-3.2	Cytosol	Translation	Structural constituent of ribosome
Q2QU06	60 kDa chaperonin alpha subunit	61.1	5.21	64.8	4.9	135	16	12	↓	-1.6	-1.9	-2.2	-2	-2.5	-2.4	-2.3	-2.5	-3.1	-2.5	-3.3	-3.7	Mitochondrion	Protein folding/refolding	ATP binding
Q10LN7	60S ribosomal protein L18, putative, expressed	21.1	11.43	18.9	6.6	188	7	3	↓	-2.4	-2.6	-3.1	-2.8	-3.4	-3.2	-2.7	-2.9	-3.3	-3.5	-3.2	-3.8	Cytosol	Translation	RNA binding
Q53JF7	Abscisic stress-ripening protein 5	15.5	6.7	24.8	6.1	217	9	5	↑	1.9	1.9	2.7	2.3	2.9	3.1	2.6	2.9	3.2	3.5	3.1	3.4	Cytosol, Nucleus	Abscisic acid signaling pathway/Stress response	Abscisic acid binding/protein phosphatase inhibitor
A0A0P0W8J1	Amine oxidase	36.3	7.27	32.6	6.5	211	11	4	↓	-1.3	-1.1	-1.9	-2.2	-2.4	-2	-2.3	-2.6	-3.4	-3.8	-3.5	-3.1		Amine metabolic process	Amine oxidase activity/quinone binding
Q7XPR2	Aminomethyltransferase	43.9	8.31	47.3	6.5	194	10	4	↓	-2.1	-2.8	-3.2	-2.5	-2.6	-3	-2.8	-2.3	-3.1	-3.5	-3.9	-3.2	Mitochondrion	Glycine decarboxylation	Aminomethyltransferase activity
Q6Z6L4	Aminopeptidase M1-A	94.6	5.1	77.5	4.5	141	11	2	↓	-1.1	-1.4	-2.2	-1.9	-2	-2.1	-2.5	-3.2	-3.5	-3.8	-3.2	-2.8	Endoplasmic reticulum	Peptide catabolic process/proteolysis	Metalloaminopeptidase activity/peptide binding
Q93WM3	Asparagine--tRNA ligase	62.58	6.43	54.8	5.3	115	18	1	↓	-2.1	-2.4	-1.7	-1.4	-2	-2.5	-2.5	-2.9	-3.2	-2.4	-2.8	-3.4	Cytoplasm	Aminoacyl-tRNA ligase activity	Asparagine-tRNA ligase activity/ATP binding
Q6KAJ2	Aspartate aminotransferase	50.3	8.09	47.3	6.1	105	12	2	↓	-2.5	-2.8	-2.3	-2.9	-3.2	-1.7	-3.1	-3.6	-2.5	-2.9	-3.2	-3		Cellular amino acid metabolism process	Pyridoxal phosphate binding
Q6ZG90	ATP synthase	27.3	6.93	34.2	5.7	127	8	2	↓	-1.2	-1.4	-2	-1.1	-2.4	-2.6	-2.1	-2.5	-3.4	-3.7	-3.1	-2.9		Pollen development
Q93VT8	ATP-citrate synthase beta chain protein 1	66	7.68	61.5	6.4	154	17	1	↓	-3.2	-3.6	-3.1	-2.9	-3.4	-2.7	-1.4	-2	-1.5	-2.1	-2.3	-2.6	Cytosol	Fatty acid biosynthetic process	Acyltransferase/lyase activity
Q6I5B2	BURP domain-containing protein 6	24.9	6.28	31.2	4.7	211	7	5	↑	2.5	2.3	2.8	3.2	3.6	3.3	1.5	1.9	1.9	2	1.8	2.9
Q7F2G3	Carbonic anhydrase	29.1	8.15	25.8	6.7	132	9	1	↑	3.1	3.5	2.9	3.6	3.9	4.4	2.5	2.1	2	3.1	3.4	1.8		Carbon utilization	carbonate dehydratase actvity
A6N0I3	Chaperonin	10.8	4.1	15.3	4.5	89	6	6	↑	3.2	3.5	4.1	4.8	3.2	4.2	2.8	3.2	3.6	3.2	3.7	2	Cytoplasm	Protein folding	chaperone
Q10HD0	Chlorophyll a-b binding protein, chloroplastic	28.5	5.91	32.4	4.1	211	8	3	↓	-1.4	-1.8	-2	-1.9	-2.4	-2.7	-3.4	-3.7	-3.1	-3.6	-3.8	-4	Chloroplast	Light harvesting in photosystem II/protein-chromophore linkage	Chlorophyll binding/metal ion binding
Q5W6H5	Chlorophyll synthase, chloroplastic	40.6	8.12	38.1	5.9	108	12	5	↓	-2.3	-2.6	-2.4	-2.8	-3.1	-2.9	-3.2	-3.6	-3.4	-3.8	-3.5	-4	Chloroplast	Chlorophyll biosythesis	chlorophyll synthetase activity
Q10P51	Clp amino terminal domain containing protein, expressed	24.3	9.26	27.3	6.8	176	7	3	↓	-2.1	-2.4	-2.7	-2.5	-2.6	-2.2	-3.2	-3.5	-3.7	-3.4	-3.5	-3
Q69S39	Cytochrome b6-f complex iron-sulfur subunit, chloroplastic	23.9	8.25	28.2	5.9	119	8	7	↓	-1.4	-1.2	-2.3	-1.9	-2.5	-2.8	-2.5	-2.9	-3.5	-3.8	-3.3	-3.1	Chloroplast, plasma membrane	Electron transport chain	2 sulfur cluster binding/electron transporter
Q9AUN8	Dehydration stress-induced protein	17.6	7.75	23.5	5.6	79	7	10	↑	3.4	3.8	4.2	4.7	4.1	2	1.8	1.3	2	2.3	1.8	3.1
A0A0P0XM26	DNA binding protein-like	37.75	6.21	34.1	5.7	242	12	9	↓	-3.1	-3.5	-3.2	-2.8	-2.4	-3.1	-2.7	-3.2	-3.6	-3.8	-3.5	-2.7	Nucleus	Transcription	Protein dimerization activity
Q8W2C4	Elongation factor Tu	50.41	6.61	46.8	5.8	193	16	2	↓	-2.2	-2.4	-2.1	-2.5	-2.1	-2	-2.5	-2.9	-2.7	-3.3	-3.6	-3.1	Cytosol, plastid, mitochondrion	Protein biosysthesis	Elongation factor
Q42971	Enolase	47.96	5.96	51.6	5.2	135	13	9	↑	2.1	2.5	2.8	2	2.9	3.1	2.6	2.8	3.2	3.5	3.2	2.9	Cytosol	Glycolysis	phosphopyruvate hydratase activity
A2YQD9	Ferredoxin-1, chloroplastic	14.9	8.39	22.7	6.4	210	7	7	↓	-1.6	-2.3	-2.6	-2.8	-2.5	-2.8	-2.7	-3.4	-3.8	-4	-3.5	-3.1	Chloroplast	Electron transport chain	Electron transfer activity
P41344	Ferredoxin--NADP reductase, leaf isozyme 1, chloroplastic	40	8.51	35.8	6.4	154	14	6	↓	-1.3	-2.3	-1.1	-2	-2.5	-1.9	-2.6	-2.9	-2.6	-2.5	-3.1	-3.2	Chloroplast	Electron transport chain	Ferredoxin-NADP+ reductase activity
Q0JEF5	Flowering-promoting factor 1-like protein 4	13.1	8.88	21.4	5.7	103	6	4	↓	-1.3	-2.1	-1.2	-2	-2.1	-2	-2.3	-2.5	-3.5	-3.6	-2.4	-2.1		Regulation of flower development
O64422	Fructose-1,6-bisphosphatase, chloroplastic	43.6	5.12	39.5	4.8	131	9	3	↓	-3.4	-3.6	-3.2	-2.6	-2.3	-2.5	-3.7	-3.2	-3.6	-2.9	-3.1	-3	Chloroplast, cytosol, extracellular region	Fructose metabolism process/sucrose biosynthetic process	Fructose 1.6-bisphosphate 1-phosphatase activity
A3C4S4	GDP-mannose 3,5-epimerase 1	42.8	6.09	45.3	6.7	214	11	10	↑	3.4	3.6	3.9	4.3	3.3	4.1	2.1	2	3.2	3.6	2.7	3.5	Cytosol	Ascorbic acid biosynthetic process	NADP binding
P48642	Glutathione reductase, cytosolic	53.5	6.67	56.3	5.8	234	17	2	↑	2.2	2.5	2.3	2.8	3	2.6	2.7	3.4	2.9	3.6	3.9	3.1	Cytoplasm	Cell redox homeostasis	NADP binding/disulfide reductase activity
Q7XCK0	Glutathione S-transferase	30.8	6.95	33.6	5.9	165	12	10	↓	-2.3	-2.6	-2.4	-2.5	-2.9	-2.6	-3.1	-2.9	-3.4	-3.7	-2.8	-3.2	Cytoplasm	Glutathione metabolic process	Transferase/glutathione binding
Q10FQ7	Glyoxalase family protein, expressed	15.2	5.8	22.6	4.5	88	6	3	↑	3.3	3.7	4.2	4.9	4.2	4	2.8	2.5	3.1	3	2	1.9
Q948T6	Glyoxylase I	32.72	5.95	35.2	6.1	103	9	8	↑	2.9	2.4	3.2	3.7	4.5	3.2	2.1	2.5	2.8	3	3.4	3.2	Ctytoplasm	osmotic/oxidative stress	Lactoylglutathione lyase activity
A0A0P0VFX2	H(+)-exporting diphosphatase (Fragment)	32.3	7.49	39.4	6.2	131	9	2	↓	-1.1	-1.4	-2	-2.1	-2.3	-2.8	-3.3	-3.6	-3.2	-2.8	-3.5	-2.4	Membrane	Ion transport	Inorganic diphosphatase activity
Q7F280	Isocitrate dehydrogenase [NADP]	46	6.8	51.9	5.5	142	17	1	↑	2.6	2.9	3.3	3.6	3.2	3	2.1	2	1.8	1.9	2	1.6	Mitochondrion	Isocitrate/NADP metabolic process	Isocitrate dehydrogenase activity
Q03200	Light-regulated protein, chloroplastic	13.3	4.51	24.6	4.8	94	6	1	↓	-3.1	-3.5	-2.8	-2.3	-2.1	-2	-3.6	-3.1	-2.4	-2.1	-2	-2.3	Chloroplast	Circadian rhythm
Q7XDC8	Malate dehydrogenase	35.5	6.09	38.3	5.2	186	12	10	↓	-2.8	-3	-3.4	-3.7	-3.1	-3.3	-1.8	-2.5	-2.2	-2	-1.5	-1.2	Cytoplasm	Tricarboxylic acid cycle	Malate dehydrogenase activity
Q7F190	Malic enzyme	68.9	6.44	63.4	5.8	162	23	7	↓	-3.5	-3.9	-4.2	-3.2	-2.6	-2.2	-2.9	-2.4	-2.8	-3.6	-3.3	-2.1	Mitochondrion	Malate/pyruvate metabolic process	Malic enzyme activity/metal ion binding
Q0JA93	Methionine aminopeptidase	37.1	7.87	42.3	6.2	174	16	4	↓	-2.3	-2.5	-2.1	-1.6	-1.8	-2	-3.5	-3.7	-2.3	-3.1	-3.8	-4		Protein intiator methionine removal	Metal ion binding/metalloaminopeptidase activity
Q6Z1H2	Mitochondrial import inner membrane translocase subunit	8.3	5.31	16.3	4.8	127	6	8	↑	3.4	3.9	4.4	4.9	4.1	3.7	2.7	3.3	1.8	1.8	3.5	3.1	Mitochondrion	Protein transport	Chaperone
Q8HCR7	NADH-ubiquinone oxidoreductase chain 1	36.1	7.96	39.3	6.7	115	8	Mt	↓	-2.4	-2.7	-3.1	-3.3	-2.5	-3.4	-3.3	-3.7	-3.9	-2.8	-3.2	-3.5	Mitochondrion/plasma membrane	Aerobic respiration	NADH dehydrogenase activity
Q2QVJ6	NADP-dependent oxidoreductase P2, putative, expressed	38.3	5.82	34.7	5.2	218	11	12	↑	2.3	2.8	2.7	2.3	2.4	2.9	3.3	3	3.1	2.5	3	3.2	Cytoplasm	Iron-sulfur cluster assembly	NADP binding
Q10MC1	NifU-like domain containing protein, expressed	23.4	4.98	26.1	4.4	158	9	3	↓	-2.3	-2.4	-2.5	-1.3	-1.6	-1.8	-3.1	-3.7	-3.5	-4.2	-3.2	-3	Mitochondrion	Protein maturation	iron ion binding
P16081	Nitrate reductase [NADH] 1	101.4	6.64	78.6	5.9	253	24	8	↓	-2.6	-2.4	-1.5	-1.9	-2	-2.6	-3.8	-3.9	-4.3	-4.5	-3.6	-3.2	Cytosol	Nitrate assimilation	Nitrate reductase (NADH) activity/FAD and heme binding
Q0IU70	Nitrogen fixation protein, putative	24.5	5.57	27.8	6.1	177	8	11	↓	-3.2	-3.5	-3.7	-2.5	-2.9	-3.1	-4.3	-4.8	-5	-3.6	-3.2	-3.3	Chloroplast, mitochondrion	Iron-sulfur cluster assembly/protein maturation	4 sulfur cluster binding
Q6AUR2	Nitrogen regulatory protein P-II homolog	58.9	6.3	51.4	5.8	235	21	5	↓	-1.6	-2.2	-2	-1.7	-1.6	-2.5	-4.2	-4.6	-4.1	-3.2	-3.9	-4.6	Chloroplast, cytosol	Regulation of nitrogen utilization	ATP binding/enzyme regulator activity
Q0D5P8	Oxygen-evolving enhancer protein 3, chloroplastic	23	9.8	26.9	6.7	129	7	7	↓	-3.2	-3.5	-2.9	-2.4	-2.8	-3.3	-3.6	-3.9	-4.2	-3.5	-3.7	-4.3	Chloroplast	Photosynthetic electron transport chain	Electron transporter/calcium ion binding
Q5U1Q2	Peroxidase	33.4	6.98	30.2	5.9	106	10	3	↑	3.4	3.1	3.6	4.1	3.7	3.2	2.3	2.8	2.6	1.9	1.9	2	Extracellular region	Oxidative stress response	Oxidoreductase/peroxidae activity
Q8H4V1	Phosphoenolpyruvate carboxylase	110	5.8	82.6	4.6	193	23	8	↓	-3.5	-3.2	-3.3	-2.8	-2.3	-2.5	-2.1	-2.2	-2	-1.7	-1.9	-2.4	Chloroplast, cytosol, extracellular region	Tricarboxylic acid cycle/leaf development	Carboxylase activity
Q6H6C7	Phosphoglycerate kinase	42.1	5.86	37.5	5.2	152	13	2	↓	-2.3	-2.4	-2.3	-2.1	-2.5	-2.8	-2.4	-2.8	-2.7	-3.1	-3.2	-3.4	Cytosol	glycolytic process/oxidative phosphorylation	ADP and ATP binding/ phospoglycerate kinase activity
Q6Z8F4	Phosphoribulokinase	44.8	6.02	40.1	5.5	133	14	2	↓	-2.6	-2.9	-2.5	-2	-1.4	-2	-3.3	-3.7	-3.9	-3.1	-2.6	-3.2	Chloroplast	Pentose-phosphate cycle	ATP binding/kinase actvity
Q8LMR0	Phosphoserine aminotransferase	44.9	8.29	47.2	5.6	98	13	3	↓	-3.4	-3.5	-3.8	-2.8	-3.1	-3.3	-2.9	-3.5	-3.9	-4.2	-3.8	-4.4	Chloroplast	L-serine biosynthetic process	Aminotransferase activity/pyridoxal phosphate binding
P0C355	Photosystem I P700 chlorophyll a apoprotein A1	83.1	7.11	71.5	6.6	227	25	Pt	↓	-3.1	-2.8	-3.5	-3.8	-3	-3.2	-3.3	-3.4	-3.1	-1.7	-2.8	-3.1	Chloroplast	Photosynthesis/protein-chromophore linkage	Electron transfer activity/chlorophyll binding
Q0DG05	Photosystem I reaction center subunit VI, chloroplastic	15	10.17	21.6	6.7	241	8	5	↓	-2.3	-2.5	-2	-1.4	-1.8	-2.3	-3.6	-3.9	-4.4	-4.7	-3.6	-3.8	Chloroplast	Light reaction/photosynthesis	Light harvesting
Q0JG75	Photosystem II reaction center PSB28 protein, chloroplastic	19.7	9.76	25.9	6.1	163	9	1	↓	-3.5	-3.2	-3	-2.7	-3.1	-3.5	-3.8	-3.2	-3.9	-3.3	-3.7	-4.2	Chloroplast	Photosynthesis	Electron transfer activity
Q0DFC9	Plastocyanin, chloroplastic	15.6	5.87	26.2	4.8	87	7	6	↓	-2.1	-2.5	-1.9	-2	-2.4	-3.2	-2.9	-2.7	-2.6	-3.3	-3.7	-3.9	Chloroplast	Electron transport chain	Electron transport/metal-binding activity
Q75HP9	Potassium channel AKT2	94.7	7.09	70.2	6.2	91	11	5	↓	-1.9	-1.5	-2.2	-2.3	-1.7	-2.1	-2.7	-2.5	-3.3	-3.1	-3	-3.1	Membrane	Regulation of ion transmembrane transport	Voltage-gated potassium channel activity
Q5VQK9	Protein CHLOROPLAST ENHANCING STRESS TOLERANCE, chloroplastic	31.7	4.69	34.2	5.3	163	9	1	↓	-1.5	-1.7	-1.9	-2	-2.4	-2.6	-3.2	-3.5	-3.8	-3.2	-3.1	-3.9	Chloroplast	Stress response	Chloroplast organization/photosystem I assembly/response to photooxidative
Q53LQ0	Protein disulfide isomerase-like 1-1	56.8	5.12	49.3	4.7	210	12	11	↑	2.6	2	3.4	3.2	3.6	3.2	3.5	3.1	2.7	3.7	3.4	2	Endoplasmic reticulum	Protein folding/cell redox homeostasis	Protein disulfide isomerase activity
Q6YZX6	Putative Aconitate hydratase, cytoplasmic	107.62	6.92	87.4	5.9	109	24	8	↑	1.8	2.4	2	2.4	2	1.8	3.2	3.6	3.3	3.8	3.6	4.1	Cytosol, Mitochondrion	Glyoxylate cycle	Lyase
Q6Z5N4	Pyruvate dehydrogenase E1 component subunit alpha-1	42.7	7.77	39.8	6.4	268	12	2	↓	-1.5	-1.2	-2.3	-2	-2.5	-2.4	-3.5	-3.2	-3.7	-3.9	-3.5	-4	Mitochondrion	glycolytic process	Pyruvate dehydrogenase activity
P0C512	Ribulose bisphosphate carboxylase large chain	52.8	6.68	55.2	6.1	325	23	Pt	↓	-2.5	-3.4	-3.7	-2.9	-3.1	-3.6	-4.1	-4.4	-3.9	-4.6	-4.9	-4.2	Chloroplast	Photorespiration/pentose-phosphate and Calvin cycles	RUBP carboxylase/monooxygenase activity
P18566	Ribulose bisphosphate carboxylase small chain A, chloroplastic	19.6	8.85	23.1	5.9	103	10	12	↓	-3.2	-3.4	-3.7	-3.5	-3.8	-3.3	-3.5	-3.8	-4.2	-4.5	-3.6	-3.7	Chloroplast	Photorespiration/pentose-phosphate and Calvin cycles	monooxygenase/carboxylase activity
P93431	Ribulose bisphosphate carboxylase/oxygenase activase, chloroplastic	51.4	5.62	47.8	4.8	192	15	11	↓	-2.1	-2.4	-3.4	-3.8	-3.3	-2.5	-3.4	-3.7	-3.9	-4.2	-4	-3.6	Chloroplast	Calvin cycle	Rubisco activator activity/ATP binding
Q0J9Y2	RNA-binding protein L	46.2	6.42	52.3	6.5	131	13	4	↓	-3.2	-3.6	-4	-3.1	-2.6	-2.8	-2.3	-2.4	-1.9	-2.5	-2.3	-3	Cytosol, nucleus	Transcription	mRNA binding
Q6K9N6	Succinate--CoA ligase [ADP-forming] subunit beta, mitochondrial	45.1	5.1	41.6	5.3	211	12	2	↓	-4.1	-3.6	-3.4	-3.7	-2.4	-2.8	-3.9	-3.7	-4.2	-4.5	-3.4	-2.9	Mitochondrion	Tricarboxylic acid cycle	ATP binding/succinate-CoA ligase activity
P93407	Superoxide dismutase [Cu-Zn], chloroplastic	21.3	6.25	25.3	5.7	129	8	8	↑	3.5	3.9	3.3	3.5	4	3.6	3.8	4.1	4.5	4.8	5	4.3	Chloroplast, extracellular region	Antioxidant/stress response	superoxide dismutase activity
Notes:
[Thr.] = theoretical
[Exp.] = experimental
[Mr.] = molecular weight in kilodalton
[pI] = isoelectric point
[M.S] = mascot score
[↑] = up-regulated protein
[↓] = down-regulated protein
[S1] = 3rd tiller, [S2] = 6th tiller, [S3] = flag leaf, [S4] = booting, [S5] = panicle, and [S6] = milk stages
